# Supplementary material for: Rambellisea gigliensis and Rambellisea halocynthiae, gen. et spp. nov. (Lulworthiaceae) from the Marine Tunicate Halocynthia papillosa
Source: MDPI journal article supplement (doi:10.3390/jof10020127), 2024-02-03
Supplement: s1 [file s1]

## Supplementary Materials

# *Rambellisea gigliensis* and *Rambellisea halocynthiae*, gen. et spp. nov. (Lulworthiaceae) from the Marine Tunicate *Halocynthia papillosa*

Martina Braconcini <sup>1</sup>, Susanna Gorrasi <sup>1</sup>, Massimiliano Fenice <sup>1,2</sup>, Paolo Barghini <sup>1</sup> and Marcella Pasqualetti <sup>1,3,\*</sup>

<sup>1</sup> Department of Ecological and Biological Sciences (DEB), University of Tuscia, 01100 Viterbo, Italy; martina.braconcini@unitus.it (M.B.); gorrasi@unitus.it (S.G.); fenice@unitus.it (M.F.); barghini@unitus.it (P.B.)

<sup>2</sup> Laboratory of Applied Marine Microbiology, CoNISM, Department of Ecological and Biological Sciences, University of Tuscia, 01100 Viterbo, Italy

<sup>3</sup> Laboratory of Ecology of Marine Fungi, CoNISM, Department of Ecological and Biological Sciences, University of Tuscia, 01100 Viterbo, Italy

\* Correspondence: mpasqual@unitus.it; Tel.: +39-0761-357750

## List of Contents

Table S1. Substitution rates, gamma distribution shape parameter and proportion of invariable sites for each partition

Table S2. The variable sites detected in the nrITS region among *Rambellisea halocynthiae*, *R. gigliensis* and its neighbor species belonging to the genera *Paralulworthia*.

Table S3. The variable sites detected in the nrLSU region among *Rambellisea halocynthiae*, *R. gigliensis* and its neighbor species belonging to the genera *Paralulworthia*.

Table S4. The variable sites detected in the nrSSU region among *Rambellisea halocynthiae*, *R. gigliensis* and its neighbor species belonging to the genera *Paralulworthia*.

Figure S1. *Rambellisea gigliensis* sp. nov. HPa3 (MUT 6843). (a) 28-day-old colony: colony texture on MEAws at 25° C; (b) 28-day-old colony: colony texture on CMAws at 25° C.

Figure S2. *Rambellisea halocynthiae* sp. nov. HPa52 (MUT 6851). (a) 28-day-old colony on MEAws (Ø 9 cm) at 25° C (b) and reverse; (c) 28-day-old colony on CMAws (Ø 9 cm) at 25° C (d) and reverse

**Citation:** Braconcini, M.; Gorrasi, S.; Fenice, M.; Barghini, P.; Pasqualetti, M. *Rambellisea gigliensis* and *Rambellisea halocynthiae*, gen. et spp. nov. (Lulworthiaceae) from the Marine Tunicate *Halocynthia papillosa*. *J. Fungi* **2024**, *10*, 127. <https://doi.org/10.3390/jof10020127>

Academic Editor: Philippe Silar

Received: 20 November 2023

Revised: 24 January 2024

Accepted: 1 February 2024

Published: 3 February 2024

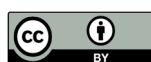

**Copyright:** © 2024 by the authors. Licensee MDPI, Basel, Switzerland. This article is an open access article distributed under the terms and conditions of the Creative Commons Attribution (CC BY) license (<https://creativecommons.org/licenses/by/4.0/>).

**Table S1.** Substitution rates, gamma distribution shape parameter and proportion of invariable sites for each partition

|                    | Substitution rates | Gamma distribution shape | Proportion of invariable site |
|--------------------|--------------------|--------------------------|-------------------------------|
| <b>Partition 1</b> | gamma              | 0.6400                   | 0.3970                        |
| <b>Partition 2</b> | gamma              | 0.3760                   | 0                             |
| <b>Partition 3</b> | gamma              | 1.7790                   | 0                             |
| <b>Partition 4</b> | gamma              | 0.2890                   | 0                             |
| <b>Partition 5</b> | gamma              | 1.1200                   | 0                             |
| <b>Partition 6</b> | gamma              | 0.3890                   | 0                             |

**Table S2.** The variable sites detected in the nrITS region among *Rambellisea halocynthiae*, *R. gigliensis* and its neighbor species belonging to the genera *Paralutworthia*.

| Species                | Position |    |    |    |    |    |    |    |    |     |     |     |     |     |     |     |     |
|------------------------|----------|----|----|----|----|----|----|----|----|-----|-----|-----|-----|-----|-----|-----|-----|
|                        | 20       | 23 | 24 | 44 | 46 | 54 | 56 | 57 | 94 | 101 | 102 | 103 | 104 | 108 | 109 | 113 | 114 |
| <i>R. halocynthiae</i> | C        | -  | -  | T  | G  | T  | G  | G  | C  | C   | T   | C   | C   | A   | -   | T   | C   |
| <i>R. gigliensis</i>   | C        | -  | -  | C  | G  | A  | A  | A  | C  | A   | A   | A   | A   | A   | C   | T   | C   |
| <i>P. candida</i>      | -        | A  | A  | T  | A  | -  | T  | G  | A  | C   | A   | C   | G   | C   | A   | C   | A   |
| <i>P. elbensis</i>     | -        | A  | A  | T  | A  | T  | T  | G  | A  | C   | A   | C   | G   | C   | A   | C   | A   |
| <i>P. gigaspora</i>    | A        | A  | A  | T  | A  | T  | T  | G  | A  | C   | A   | C   | C   | C   | A   | C   | A   |
| <i>P. halima</i>       | A        | A  | A  | T  | A  | T  | T  | G  | A  | C   | A   | C   | C   | C   | A   | C   | A   |
| <i>P. mediterranea</i> | A        | A  | A  | T  | A  | T  | T  | G  | A  | C   | A   | C   | C   | C   | A   | C   | A   |
| <i>P. posidoniae</i>   | A        | A  | A  | T  | A  | T  | T  | G  | A  | C   | A   | C   | C   | C   | A   | C   | A   |

| Species                | Position |     |     |     |     |     |     |     |     |     |     |     |     |     |     |     |     |
|------------------------|----------|-----|-----|-----|-----|-----|-----|-----|-----|-----|-----|-----|-----|-----|-----|-----|-----|
|                        | 119      | 120 | 121 | 122 | 123 | 129 | 131 | 132 | 159 | 170 | 171 | 245 | 317 | 329 | 340 | 365 | 366 |
| <i>R. halocynthiae</i> | C        | T   | A   | C   | G   | T   | A   | A   | A   | A   | A   | A   | A   | T   | T   | C   | T   |
| <i>R. gigliensis</i>   | C        | T   | G   | C   | A   | C   | A   | A   | A   | A   | G   | A   | A   | T   | C   | T   | T   |
| <i>P. candida</i>      | A        | C   | C   | A   | G   | T   | C   | C   | G   | C   | A   | C   | G   | C   | T   | -   | -   |
| <i>P. elbensis</i>     | A        | C   | C   | A   | G   | T   | C   | C   | G   | C   | A   | C   | G   | C   | T   | -   | -   |
| <i>P. gigaspora</i>    | A        | C   | C   | A   | G   | T   | C   | C   | G   | C   | A   | C   | G   | C   | T   | C   | C   |
| <i>P. halima</i>       | A        | C   | C   | A   | G   | T   | C   | C   | G   | C   | A   | C   | G   | C   | T   | C   | C   |
| <i>P. mediterranea</i> | A        | C   | C   | A   | G   | T   | C   | C   | G   | C   | A   | C   | G   | C   | T   | C   | C   |
| <i>P. posidoniae</i>   | A        | C   | C   | A   | G   | T   | C   | C   | G   | C   | A   | C   | G   | C   | T   | C   | C   |

| Species                | Position |     |     |     |     |     |     |     |     |     |     |     |     |     |     |     |     |
|------------------------|----------|-----|-----|-----|-----|-----|-----|-----|-----|-----|-----|-----|-----|-----|-----|-----|-----|
|                        | 368      | 369 | 370 | 371 | 373 | 374 | 376 | 377 | 384 | 385 | 386 | 400 | 429 | 430 | 439 | 447 | 464 |
| <i>R. halocynthiae</i> | T        | C   | C   | T   | C   | G   | G   | A   | T   | G   | G   | C   | A   | A   | T   | C   | C   |
| <i>R. gigliensis</i>   | C        | T   | T   | C   | C   | A   | G   | A   | C   | G   | T   | T   | C   | A   | G   | C   | C   |
| <i>P. candida</i>      | A        | C   | C   | T   | T   | T   | C   | G   | T   | A   | G   | C   | T   | C   | G   | T   | T   |
| <i>P. elbensis</i>     | A        | C   | C   | T   | T   | T   | C   | G   | T   | A   | G   | C   | T   | C   | G   | T   | T   |
| <i>P. gigaspora</i>    | A        | C   | C   | T   | T   | T   | C   | G   | T   | A   | G   | C   | T   | C   | G   | T   | T   |
| <i>P. halima</i>       | A        | C   | C   | T   | T   | T   | C   | G   | T   | A   | G   | C   | T   | C   | G   | T   | T   |
| <i>P. mediterranea</i> | A        | C   | C   | T   | T   | T   | C   | G   | T   | A   | G   | C   | T   | C   | G   | T   | T   |
| <i>P. posidoniae</i>   | A        | C   | C   | T   | T   | T   | C   | G   | T   | A   | G   | C   | T   | C   | G   | T   | T   |

| Species                | Position |     |     |     |     |     |     |     |     |     |     |     |     |     |     |     |     |
|------------------------|----------|-----|-----|-----|-----|-----|-----|-----|-----|-----|-----|-----|-----|-----|-----|-----|-----|
|                        | 465      | 470 | 474 | 486 | 487 | 488 | 509 | 512 | 513 | 514 | 515 | 516 | 531 | 532 | 576 | 578 | 582 |
| <i>R. halocynthiae</i> | C        | C   | T   | -   | -   | -   | G   | T   | C   | G   | G   | T   | G   | A   | T   | C   | C   |
| <i>R. gigliensis</i>   | T        | G   | T   | -   | -   | -   | G   | T   | C   | G   | G   | T   | G   | A   | C   | C   | G   |
| <i>P. candida</i>      | C        | T   | C   | C   | C   | A   | A   | C   | A   | -   | -   | -   | A   | G   | C   | A   | C   |
| <i>P. elbensis</i>     | C        | T   | C   | C   | C   | A   | A   | C   | A   | -   | -   | -   | A   | G   | C   | A   | C   |

|                        |   |   |   |   |   |   |   |   |   |   |   |   |   |   |   |   |   |
|------------------------|---|---|---|---|---|---|---|---|---|---|---|---|---|---|---|---|---|
| <i>P. gigaspora</i>    | C | C | C | C | C | A | A | C | A | - | - | - | A | G | C | A | C |
| <i>P. halima</i>       | C | C | C | C | C | A | A | C | A | - | - | - | A | G | C | A | C |
| <i>P. mediterranea</i> | C | C | C | C | C | A | A | C | A | - | - | - | A | G | C | A | C |
| <i>P. posidoniae</i>   | C | C | C | C | C | A | A | C | A | - | - | - | A | G | C | A | C |

|                        | 588 | 589 | 600 |
|------------------------|-----|-----|-----|
| <i>R. halocynthiae</i> | A   | C   | A   |
| <i>R. gigliensis</i>   | C   | T   | A   |
| <i>P. candida</i>      | A   | C   | C   |
| <i>P. elbensis</i>     | A   | C   | C   |
| <i>P. gigaspora</i>    | A   | C   | C   |
| <i>P. halima</i>       | A   | C   | C   |
| <i>P. mediterranea</i> | A   | C   | C   |
| <i>P. posidoniae</i>   | A   | C   | C   |

**Table S3.** The variable sites detected in the nrLSU region among *Rambellisea halocynthiae*, *R. gigliensis* and its neighbor species belonging to the genera *Paralutworthia*.

| Species                | Position |     |     |     |     |     |     |     |     |     |     |     |     |     |     |     |     |
|------------------------|----------|-----|-----|-----|-----|-----|-----|-----|-----|-----|-----|-----|-----|-----|-----|-----|-----|
|                        | 102      | 144 | 145 | 173 | 383 | 407 | 408 | 466 | 467 | 468 | 469 | 487 | 488 | 508 | 509 | 540 | 569 |
| <i>R. halocynthiae</i> | T        | G   | G   | C   | C   | T   | C   | C   | G   | A   | T   | T   | T   | C   | T   | T   | T   |
| <i>R. gigliensis</i>   | T        | A   | C   | T   | A   | T   | C   | T   | G   | A   | C   | C   | C   | C   | T   | C   | C   |
| <i>P. candida</i>      | C        | T   | G   | C   | C   | -   | -   | T   | A   | G   | C   | C   | C   | T   | C   | T   | C   |
| <i>P. elbensis</i>     | C        | T   | G   | C   | C   | -   | -   | T   | A   | G   | C   | C   | C   | T   | C   | T   | C   |
| <i>P. gigaspora</i>    | C        | T   | G   | C   | C   | -   | -   | T   | A   | G   | C   | C   | C   | T   | C   | T   | C   |
| <i>P. halima</i>       | C        | T   | G   | C   | C   | -   | -   | T   | A   | G   | C   | C   | C   | T   | C   | T   | C   |
| <i>P. mediterranea</i> | C        | T   | G   | C   | C   | -   | -   | T   | A   | G   | C   | C   | C   | T   | C   | T   | C   |
| <i>P. posidoniae</i>   | C        | T   | G   | C   | C   | -   | -   | T   | A   | G   | C   | C   | C   | T   | C   | T   | C   |

| Species                | Position |     |     |     |     |     |     |     |     |      |      |      |      |      |      |      |
|------------------------|----------|-----|-----|-----|-----|-----|-----|-----|-----|------|------|------|------|------|------|------|
|                        | 601      | 643 | 668 | 764 | 765 | 772 | 808 | 809 | 878 | 1016 | 1050 | 1051 | 1052 | 1062 | 1070 | 1071 |
| <i>R. halocynthiae</i> | T        | T   | A   | A   | A   | A   | T   | A   | T   | T    | C    | C    | T    | G    | T    | G    |
| <i>R. gigliensis</i>   | T        | T   | A   | A   | A   | A   | T   | A   | T   | T    | T    | C    | T    | G    | C    | G    |
| <i>P. candida</i>      | C        | C   | C   | G   | G   | G   | C   | G   | C   | C    | C    | A    | C    | A    | T    | C    |
| <i>P. elbensis</i>     | C        | C   | C   | G   | G   | G   | C   | G   | C   | C    | C    | A    | C    | A    | T    | C    |
| <i>P. gigaspora</i>    | C        | C   | C   | G   | G   | G   | C   | G   | C   | C    | C    | A    | C    | A    | T    | C    |
| <i>P. halima</i>       | C        | C   | C   | G   | G   | G   | C   | G   | C   | C    | C    | A    | C    | A    | T    | C    |
| <i>P. mediterranea</i> | C        | C   | C   | G   | G   | G   | C   | G   | C   | C    | C    | A    | C    | A    | T    | C    |
| <i>P. posidoniae</i>   | C        | C   | C   | G   | G   | G   | C   | G   | C   | C    | C    | A    | C    | A    | T    | C    |

**Table S4.** The variable sites detected in the nrSSU region among *Rambellisea halocynthiae*, *R. gigliensis* and its neighbor species belonging to the genera *Paralutworthia*.

| Species                | Position |    |     |     |     |     |     |     |     |     |     |     |     |     |     |     |      |
|------------------------|----------|----|-----|-----|-----|-----|-----|-----|-----|-----|-----|-----|-----|-----|-----|-----|------|
|                        | 43       | 99 | 100 | 101 | 107 | 110 | 121 | 129 | 130 | 140 | 161 | 219 | 323 | 349 | 350 | 376 | 1126 |
| <i>R. halocynthiae</i> | T        | T  | C   | G   | A   | G   | A   | C   | T   | T   | T   | A   | A   | A   | G   | C   | T    |
| <i>R. gigliensis</i>   | T        | A  | A   | C   | C   | T   | G   | T   | T   | T   | T   | A   | A   | G   | A   | T   | T    |

|                        |   |   |   |   |   |   |   |   |   |   |   |   |   |   |   |   |   |
|------------------------|---|---|---|---|---|---|---|---|---|---|---|---|---|---|---|---|---|
| <i>P. candida</i>      | G | T | C | G | G | T | G | C | A | C | C | G | T | G | A | T | A |
| <i>P. elbensis</i>     | G | T | C | G | G | T | G | C | A | C | C | G | T | G | A | T | A |
| <i>P. gigaspora</i>    | G | T | C | G | G | T | G | C | A | C | C | G | T | G | A | T | A |
| <i>P. halima</i>       | G | T | C | G | G | T | G | C | A | C | C | G | T | G | A | T | A |
| <i>P. mediterranea</i> | G | T | C | G | G | T | G | C | A | C | C | G | T | G | A | T | T |
| <i>P. posidoniae</i>   | G | T | C | G | G | T | G | C | A | C | C | G | T | G | A | T | A |

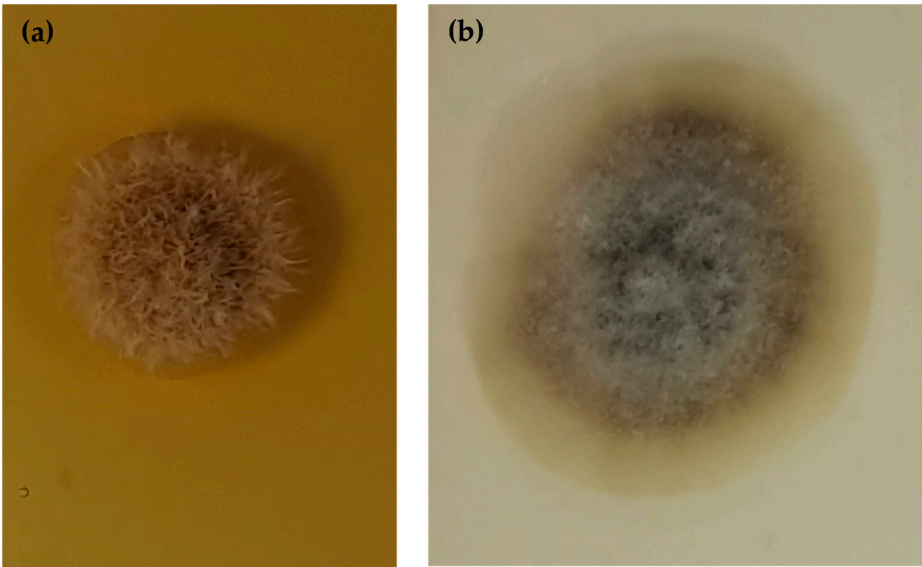

**Figure S1.** *Rambellisea gigliensis* sp. nov. HPa3 (MUT 6843). (a) 28-day-old colony: colony texture on MEAws at 25° C; (b) 28-day-old colony: colony texture on CMAws at 25° C.

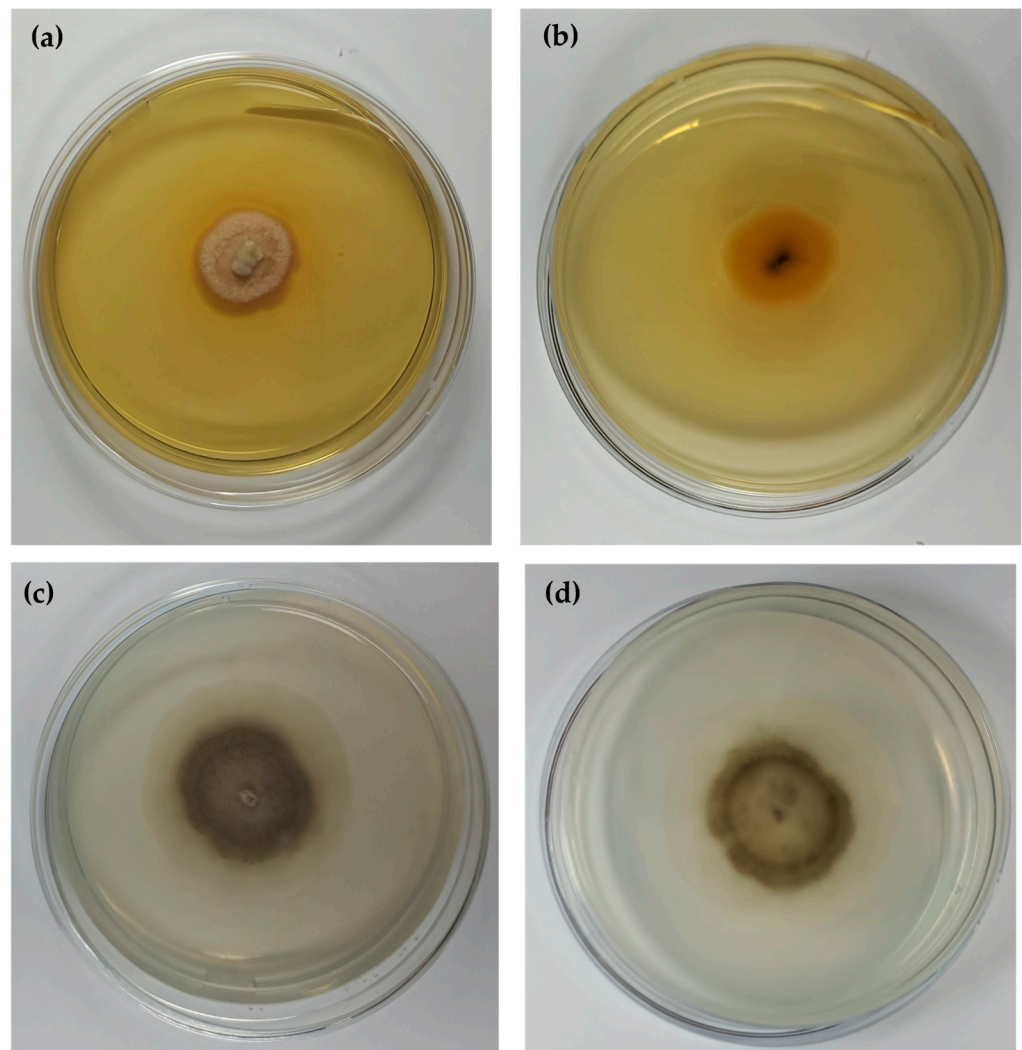

**Figure S2.** *Rambellisea halocynthiae* sp. nov. HPa52 (MUT 6851). (a) 28-day-old colony on MEA (Ø 9 cm) at 25° C (b) and reverse; (c) 28-day-old colony on CMA (Ø 9 cm) at 25° C (d) and reverse.
